# Supplementary material for: Pro-Inflammatory Chemokines CCL5, CXCL12, and CX3CL1 Bind to and Activate Platelet Integrin αIIbβ3 in an Allosteric Manner
Source: MDPI journal article supplement (doi:10.3390/cells11193059), 2022-09-29

## Supplemental Figures

### Figure S1. Effect of antagonists to $\alpha$ IIB $\beta$ 3 on chemokine binding to $\alpha$ IIB $\beta$ 3.

Well of 96-well microtiter plate were coated with chemokines (50  $\mu$ g/ml coating concentrations) and remaining protein binding sites were blocked with BSA. Wells were incubated with soluble  $\alpha$ IIB $\beta$ 3 (1  $\mu$ g/ml) in the presence of mab 7E3, eptifibatide in Tyrode-HEPES buffer with 1 mM  $Mn^{2+}$  for 1 h at room temperature and bound  $\alpha$ IIB $\beta$ 3 was quantified using anti-human  $\beta$ 3 mAb (AV10) and HRP-conjugated anti-mouse IgG. Data is shown as means  $\pm$  SD in triplicate experiments.

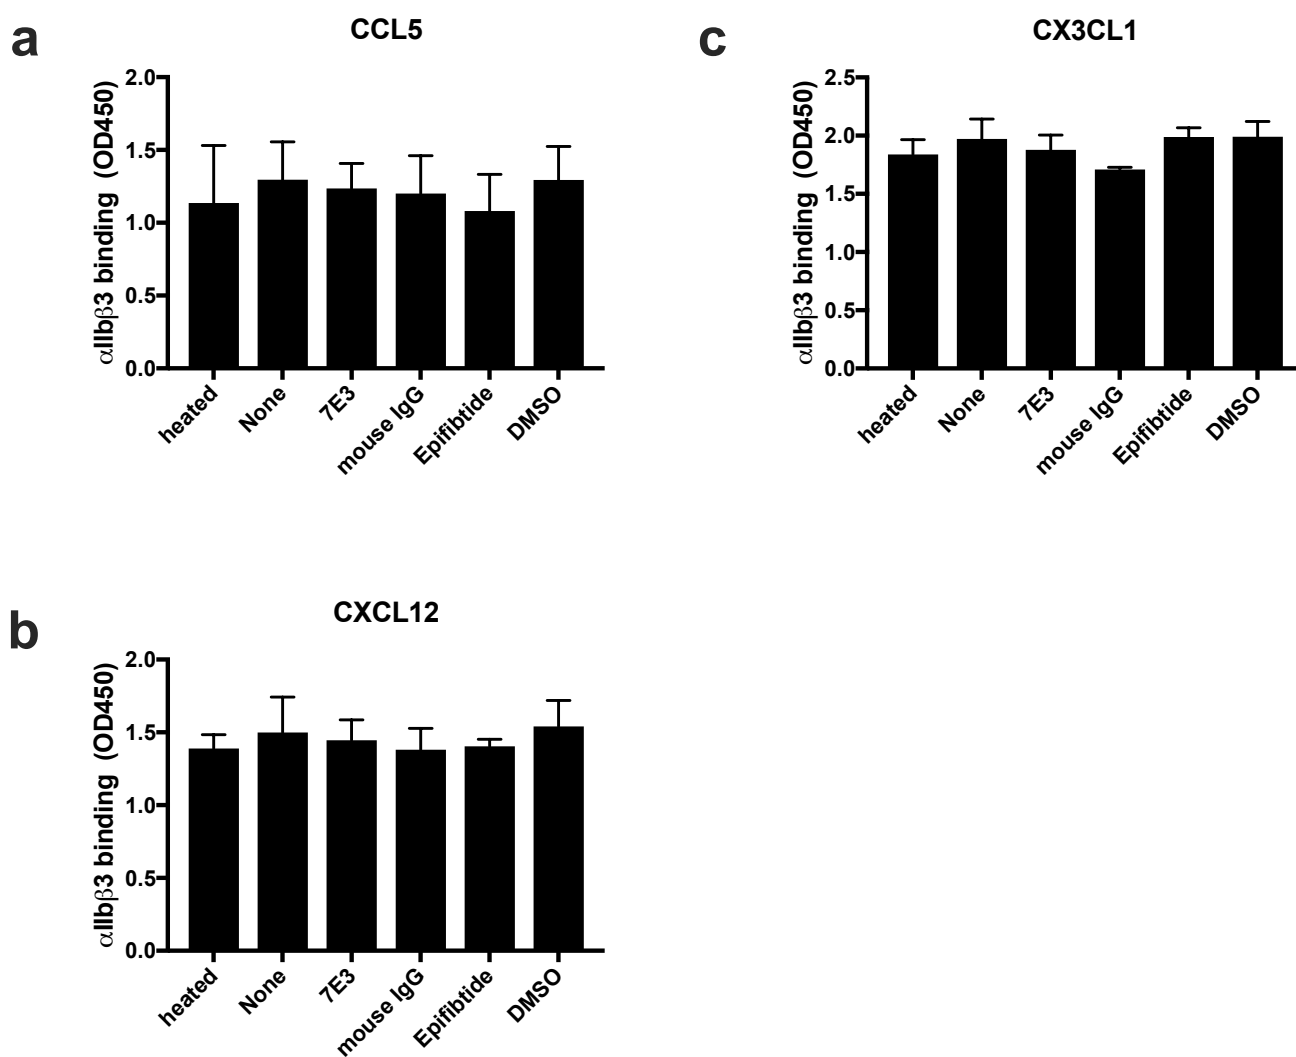

**Figure S2. Chemokines enhanced binding of soluble  $\alpha$ Ib $\beta$ 3 to immobilized fibrinogen fragment  $\gamma$ C390-411 fused to GST.**

Well of 96-well microtiter plate were coated with fibrinogen fragment  $\gamma$ C390-411 (20  $\mu$ g/ml) and remaining protein binding sites were blocked with BSA. Wells were incubated with soluble  $\alpha$ Ib $\beta$ 3 (1  $\mu$ g/ml) in the presence of chemokines at the indicated concentrations in Tyrode-HEPES buffer with 1 mM  $\text{Ca}^{2+}$  for 1 h at room temperature and bound  $\alpha$ Ib $\beta$ 3 was quantified using anti-human  $\beta$ 3 mAb (AV10) and HRP-conjugated anti- mouse IgG. Data is shown as means  $\pm$  SD in triplicate experiments.

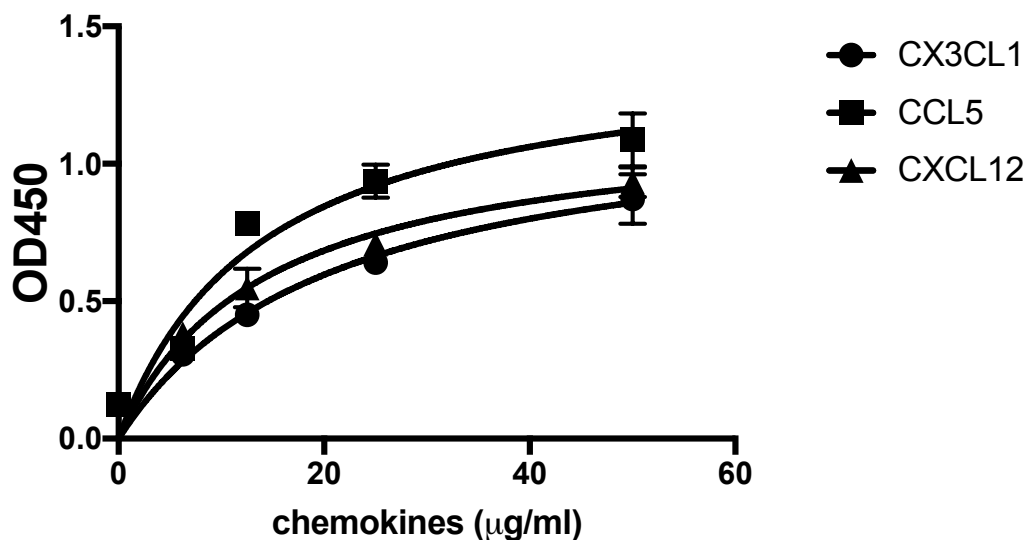

**Figure S3. Chemokines enhanced binding of soluble  $\alpha$ Ib $\beta$ 3 to immobilized  $\gamma$ C151-411 peptide fused to GST.**

Well of 96-well microtiter plate were coated with fibrinogen fragment  $\gamma$ C151-411 (50  $\mu$ g/ml) and remaining protein binding sites were blocked with BSA. Wells were incubated with soluble  $\alpha$ Ib $\beta$ 3 (1  $\mu$ g/ml) in the presence of chemokines at the indicated concentrations in Tyrode-HEPES buffer with 1 mM  $\text{Ca}^{2+}$  for 1 h at room temperature and bound  $\alpha$ Ib $\beta$ 3 was quantified using anti-human  $\beta$ 3 mAb (AV10) and HRP-conjugated anti-mouse IgG. Data is shown as means  $\pm$  SD in triplicate experiments.

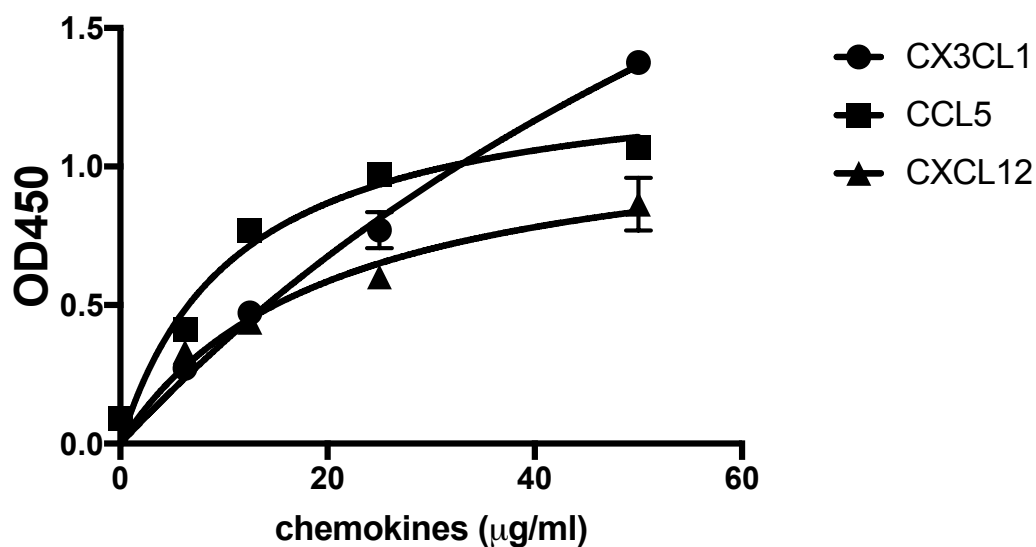

**Figure S4. Activation of  $\alpha$ IIb $\beta$ 3 on CHO cells ( $\alpha$ IIb $\beta$ 3-CHO cells) by chemokines does not induce LIBS2 epitopes.** Cells were incubated with chemokines (10  $\mu$ g/ml) and anti-LIBS2 (10  $\mu$ g/ml) in Tyrode-HEPES buffer with 1 mM  $\text{Ca}^{2+}$  (total 100  $\mu$ l) for 30 min on ice. Bound IgG was detected with FITC-labeled anti-mouse IgG in flow cytometry. Data is shown as means  $\pm$  SD in triplicate experiments.

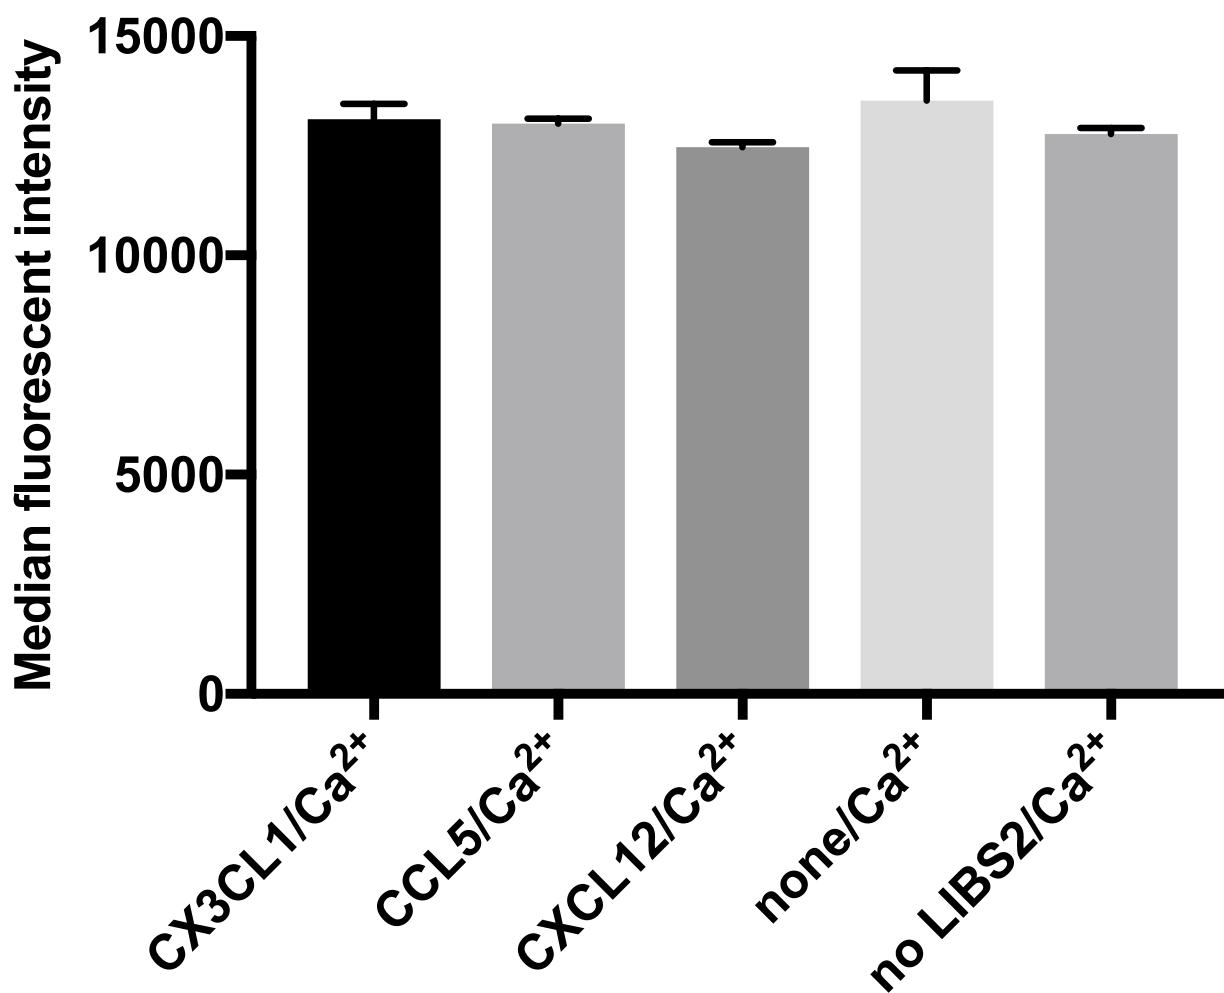

Supplement: s1 [file s1]
